# Supplementary material
Source: publisher figshare collection journal article supplement (https://tandf.figshare.com/ndownloader/files/17592503)
Supplement: Supplementary file 1 [file 17592503]

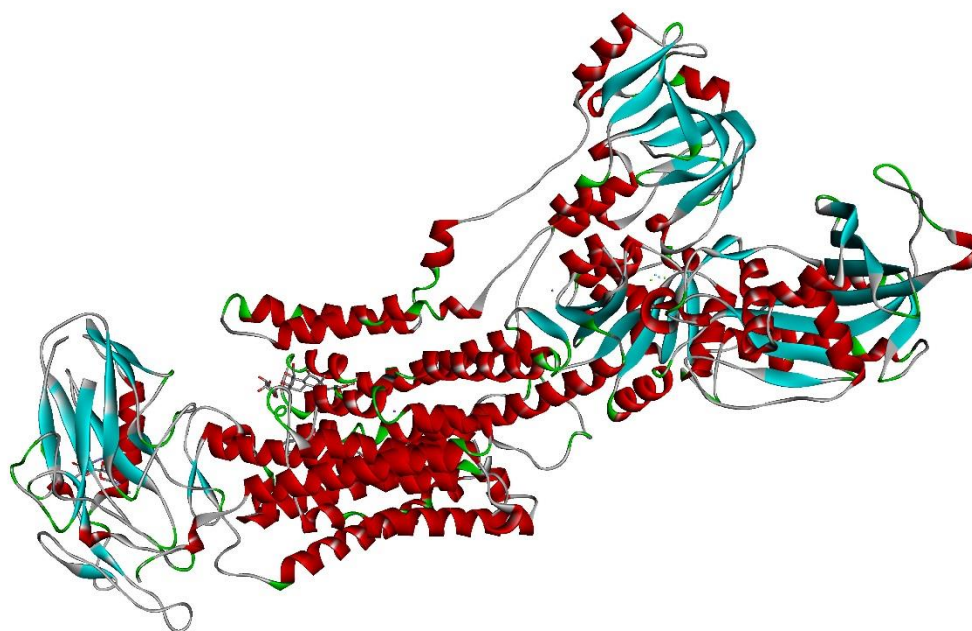

**Figure S1** Crystal structure of the sodium-potassium pump (Na<sup>+</sup>-K<sup>+</sup>-ATPase) with bound potassium and ouabain (PDB ID: 3A3Y)

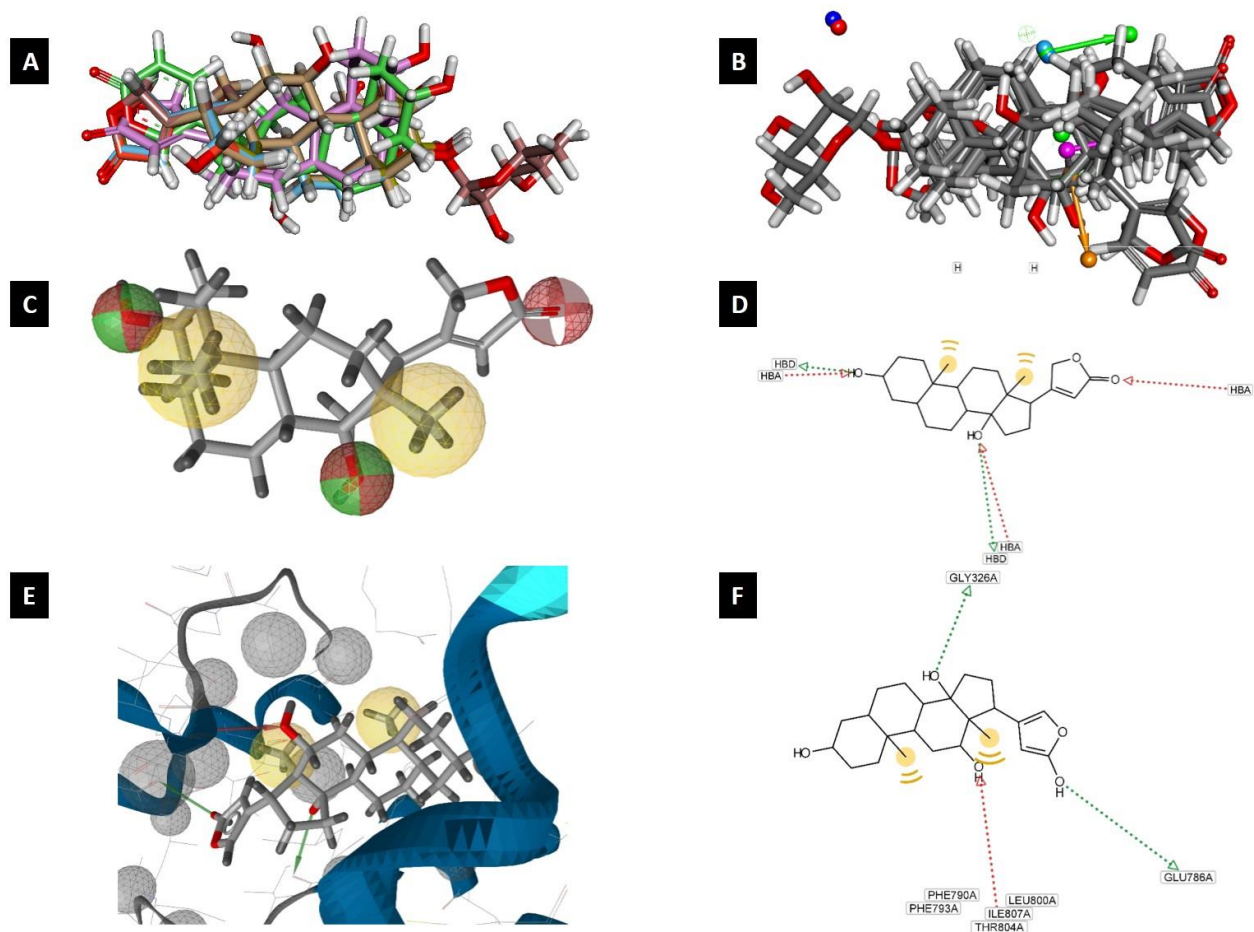

**Figure S2** Pharmacophore model: (A) Aligned molecules, (B) Shared pharmacophore features, (C) PhytochemicalScout pharmacophore model generated from Digoxigenin format (hydrogen bond Donor: green sphere, hydrogen bonds Acceptor: Red sphere and ionizable area: Blue asterisk and Aromatic rings), (D) 2D representation of mapped pharmacophore feature, (E) Structure-based mapped pharmacophore feature in 3D format, and (F) 2D representation of pharmacophore feature with amino acid residues

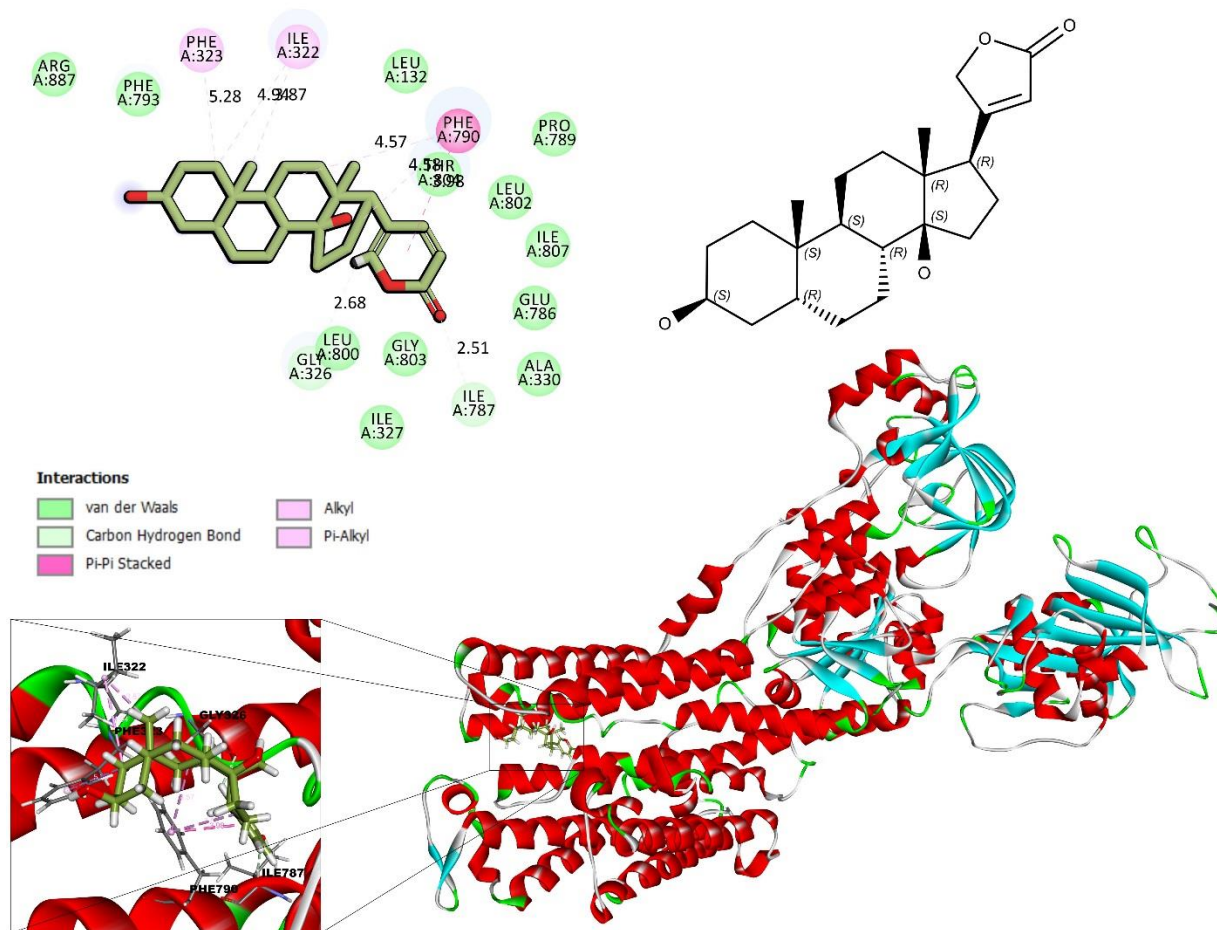

**Figure S3** Docked pose of 3A3Y protein with ligand Digitoxigenin (Blue color) docked pose and Protein– ligand interaction maps developed from Accelrys Discovery studio visualizer 2016 (van der Waals-Light Green, conventional hydrogen bonds-Green color, carbon-hydrogen-White color, unfavorable donor-donor-Red color,  $\pi$ - sigma-Purple color,  $\pi$ -  $\pi$ -T shaped-Dark pink color, alkyl and  $\pi$ - alkyl-Light Pink color)

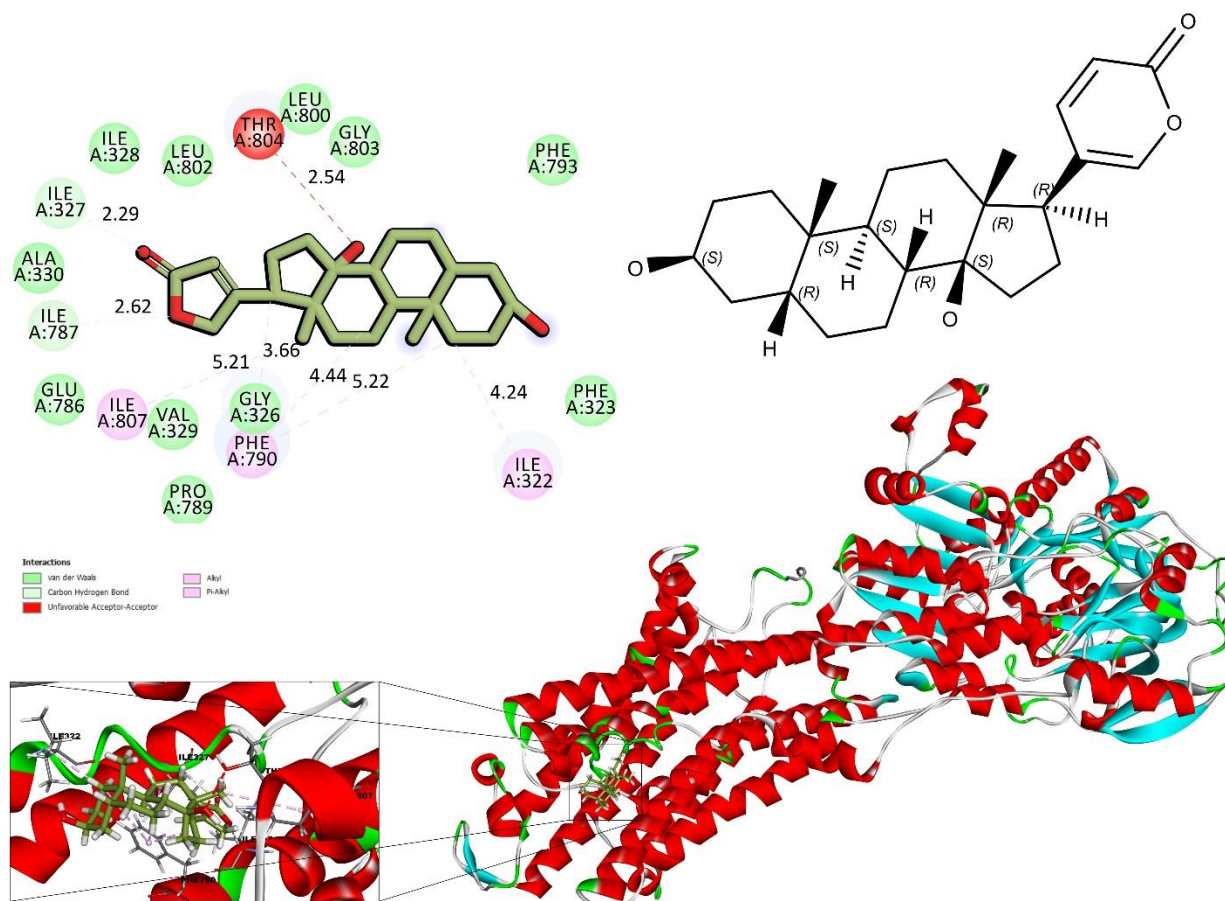

**Figure S4** Docked pose of 3A3Y protein with ligand Bufalin (Blue color) docked pose and Protein– ligand interaction maps developed from Accelrys Discovery studio visualizer 2016 (van der Waals-Light Green, conventional hydrogen bonds-Green color, carbon-hydrogen-White color, unfavorable donor-donor-Red color,  $\pi$ - sigma-Purple color,  $\pi$ -  $\pi$ -T shaped-Dark pink color, alkyl and  $\pi$ - alkyl-Light Pink color)



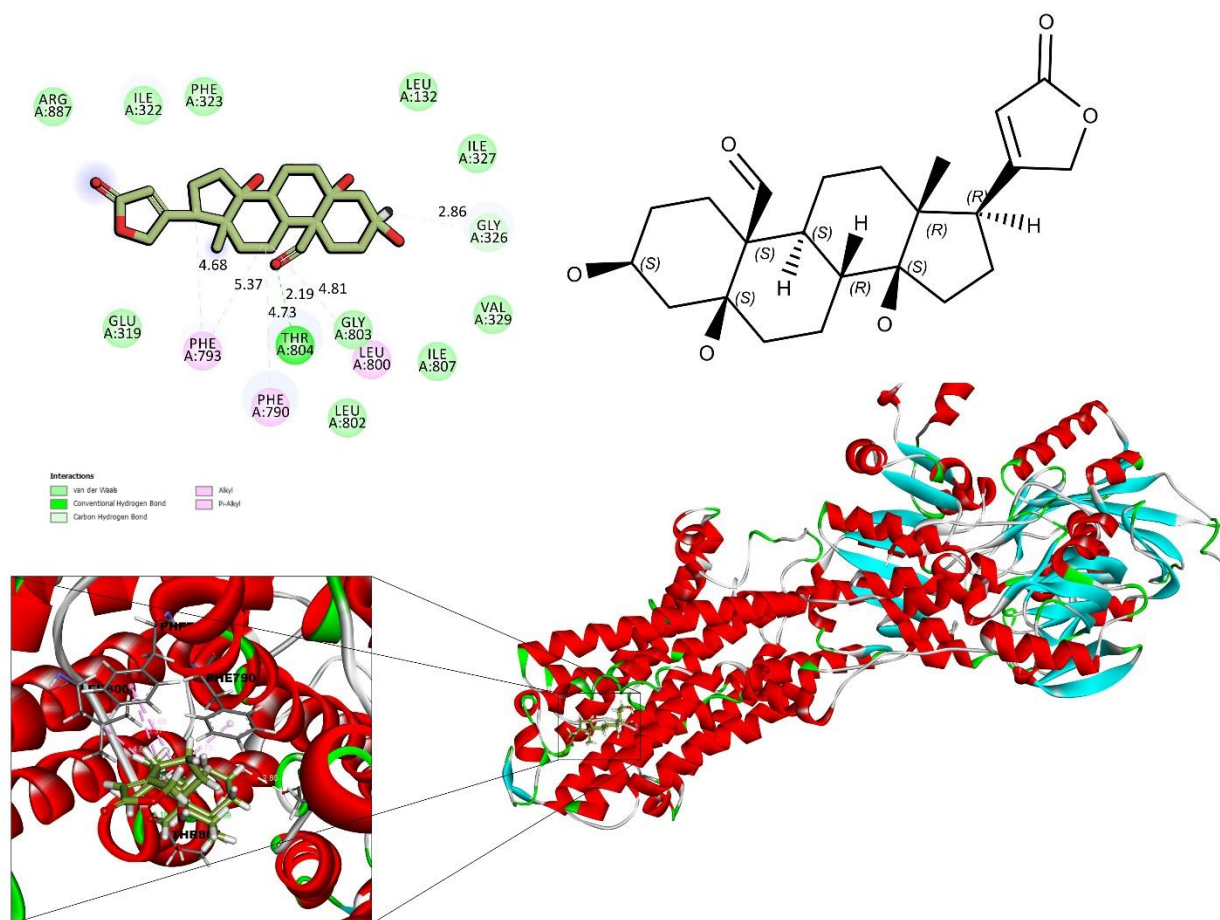

**Figure S5** Docked pose of 3A3Y protein with ligand Strophanthidin (Blue color) docked pose and Protein– ligand interaction maps developed from Accelrys Discovery studio visualizer 2016 (van der Waals-Light Green, conventional hydrogen bonds-Green color, carbon-hydrogen-White color, unfavorable donor-donor-Red color,  $\pi$ - sigma-Purple color,  $\pi$ -  $\pi$ -T shaped-Dark pink color, alkyl and  $\pi$ - alkyl-Light Pink color ligand

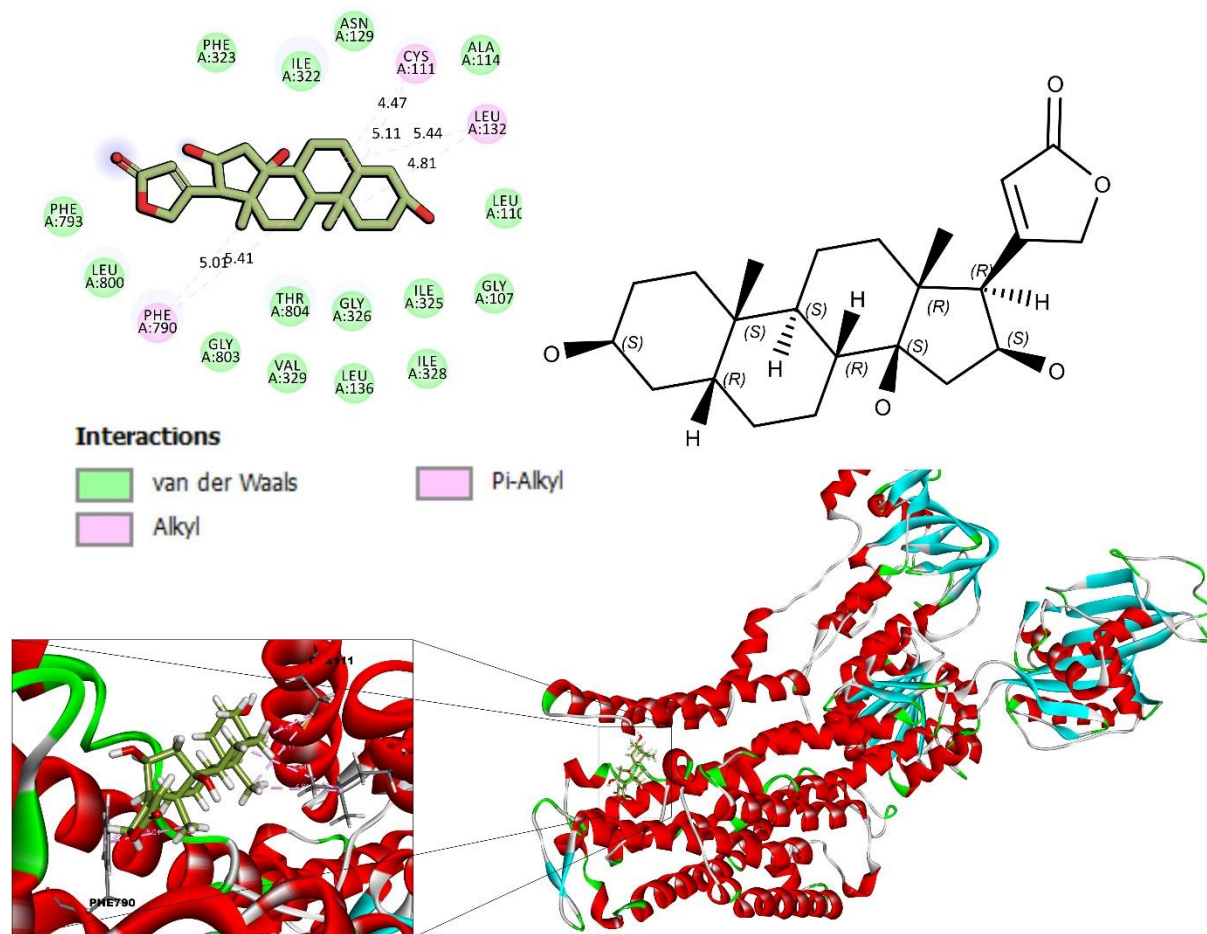

**Figure S6** Docked pose of 3A3Y protein with ligand Gitoxigenin (Blue color) and Protein–ligand interaction maps developed from Accelrys Discovery studio visualizer 2016 (van der Waals-Light Green, conventional hydrogen bonds-Green color, carbon-hydrogen-White color, unfavourable donor-donor-Red color,  $\pi$ -sigma-Purple color,  $\pi$ - $\pi$  T shaped-Dark pink color, alkyl and  $\pi$ -alkyl-Light Pink color)

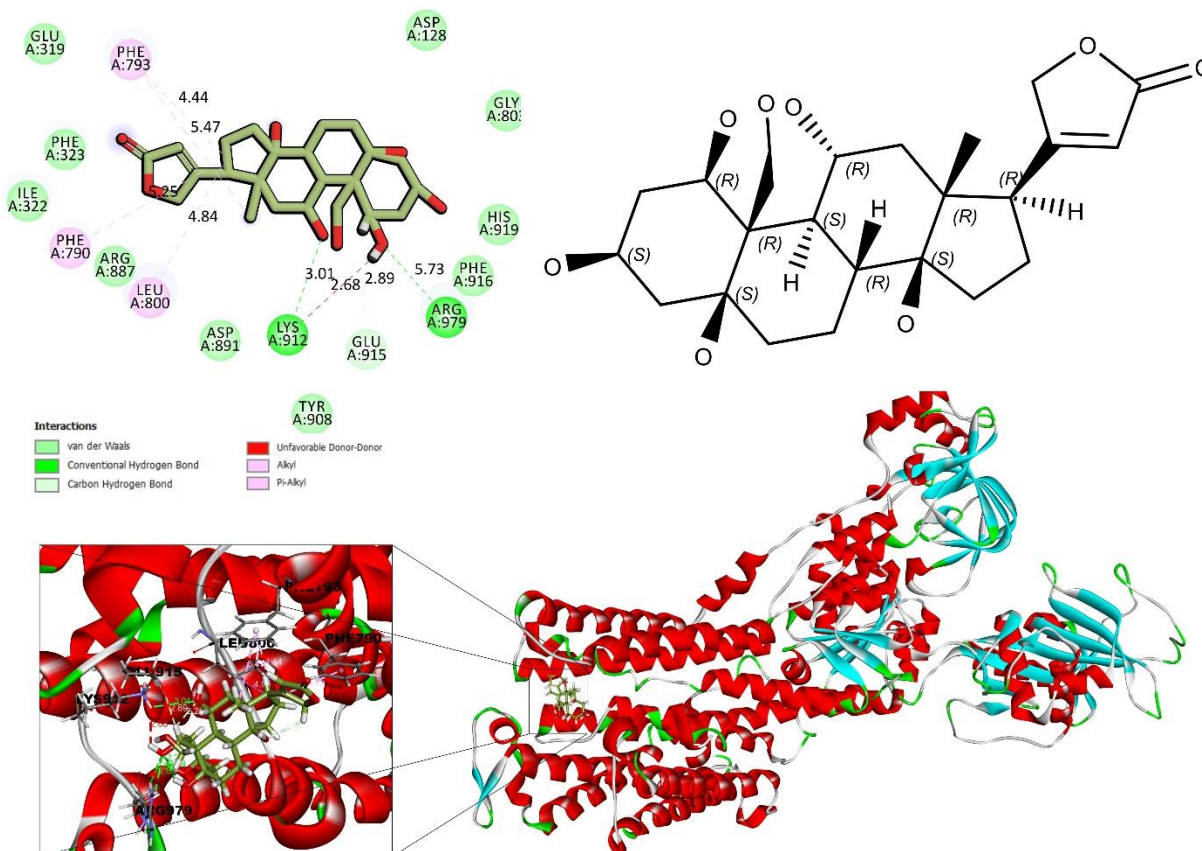

**Figure S7** Docked pose of 3A3Y protein with ligand Ouabagenin (Blue color) docked pose and Protein– ligand interaction maps developed from Accelrys Discovery studio visualizer 2016 (van der Waals-Light Green, conventional hydrogen bonds-Green color, carbon-hydrogen-White color, unfavorable donor-donor-Red color,  $\pi$ - sigma-Purple color,  $\pi$ -  $\pi$  T shaped-Dark pink color, alkyl and  $\pi$ - alkyl-Light Pink color)

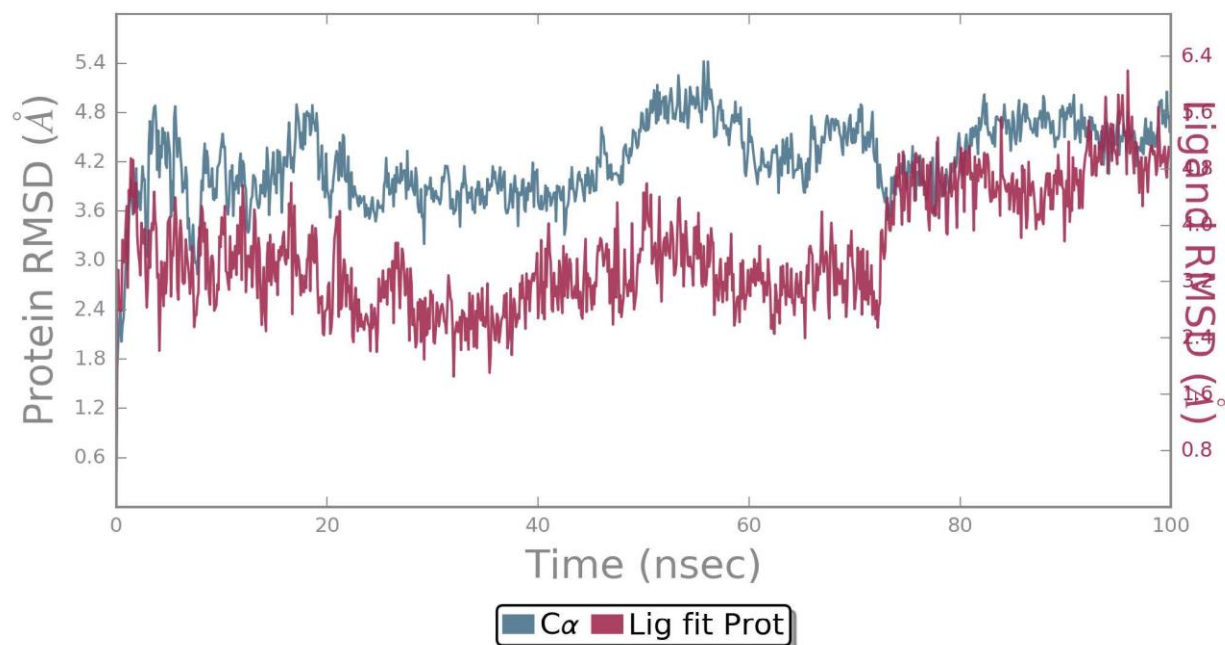

**Figure S8** Protein- ligand RMSD analysis with residue index and Time level: C $\alpha$  (blue color), side chains (green color), heavy atoms (yellow color), ligand with protein (dark pink color), ligand with ligand (pink color); Structure of the 3A3Y with Digoxigenin - Time against Protein RMSD



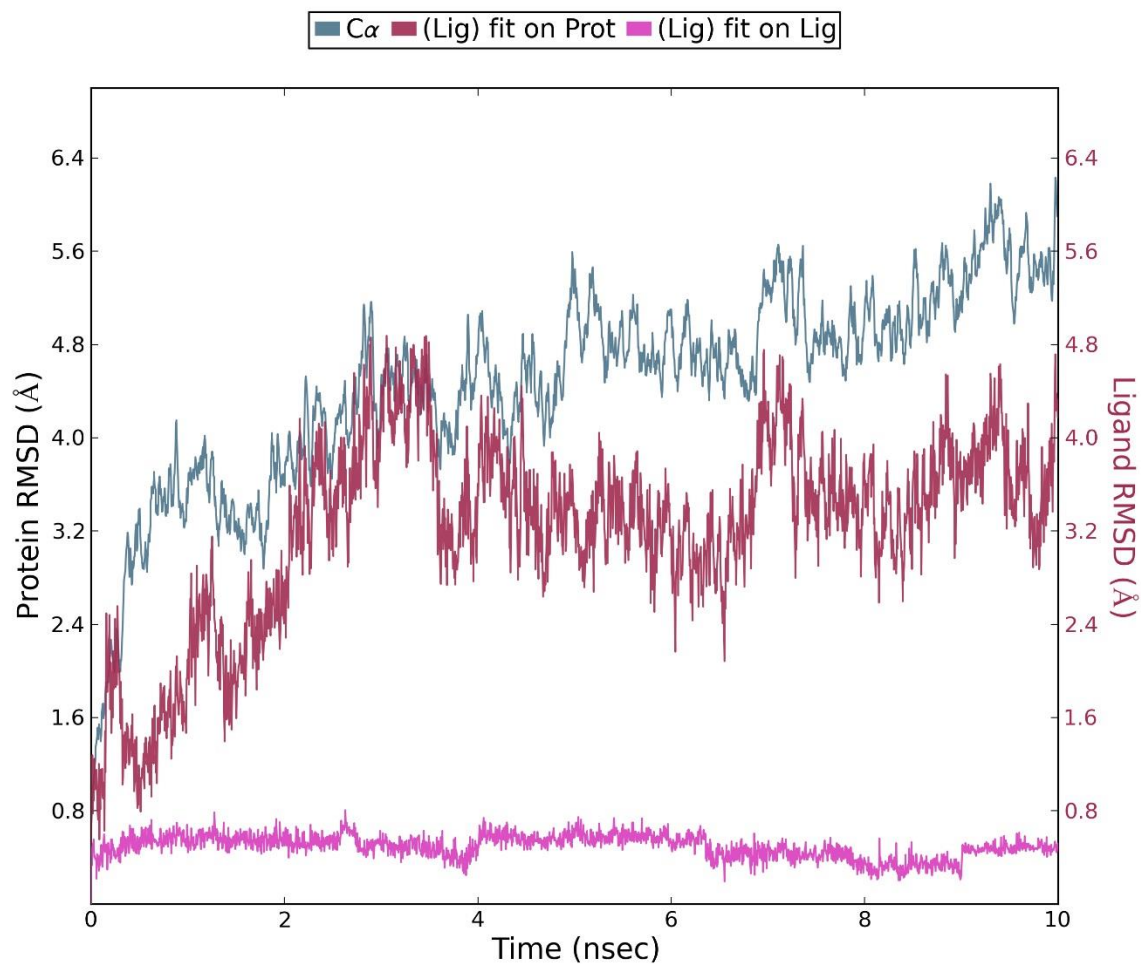

**Figure S9** Protein- ligand RMSD analysis with residue index and Time level:  $C\alpha$  (blue color), side chains (green color), heavy atoms (yellow color), ligand with protein (dark pink color), ligand with ligand (pink color); Structure of the 3A3Y with Ouabain - Time against Protein RMSD

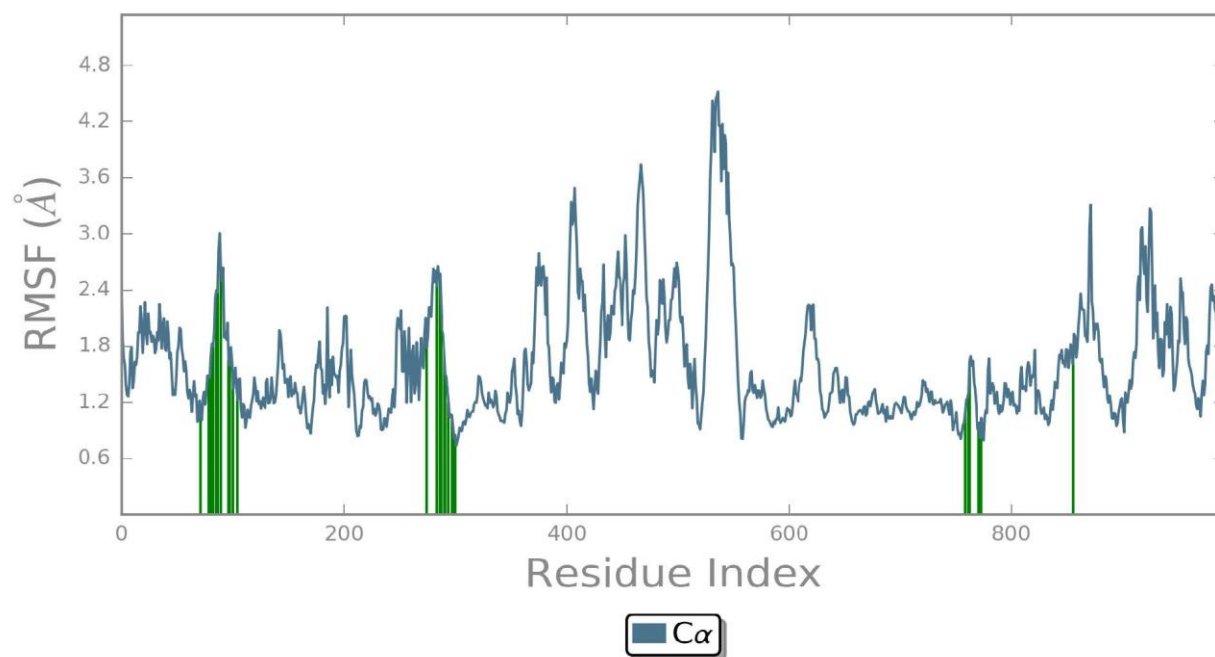

**Figure S10** Protein- ligand RMSF analysis with residue index and Time level: C $\alpha$  (blue color), side chains (green color), heavy atoms (yellow color), ligand with protein (dark pink color), ligand with ligand (pink color); Structure of the 3A3Y with Digoxigenin - Residue Index against RMSF

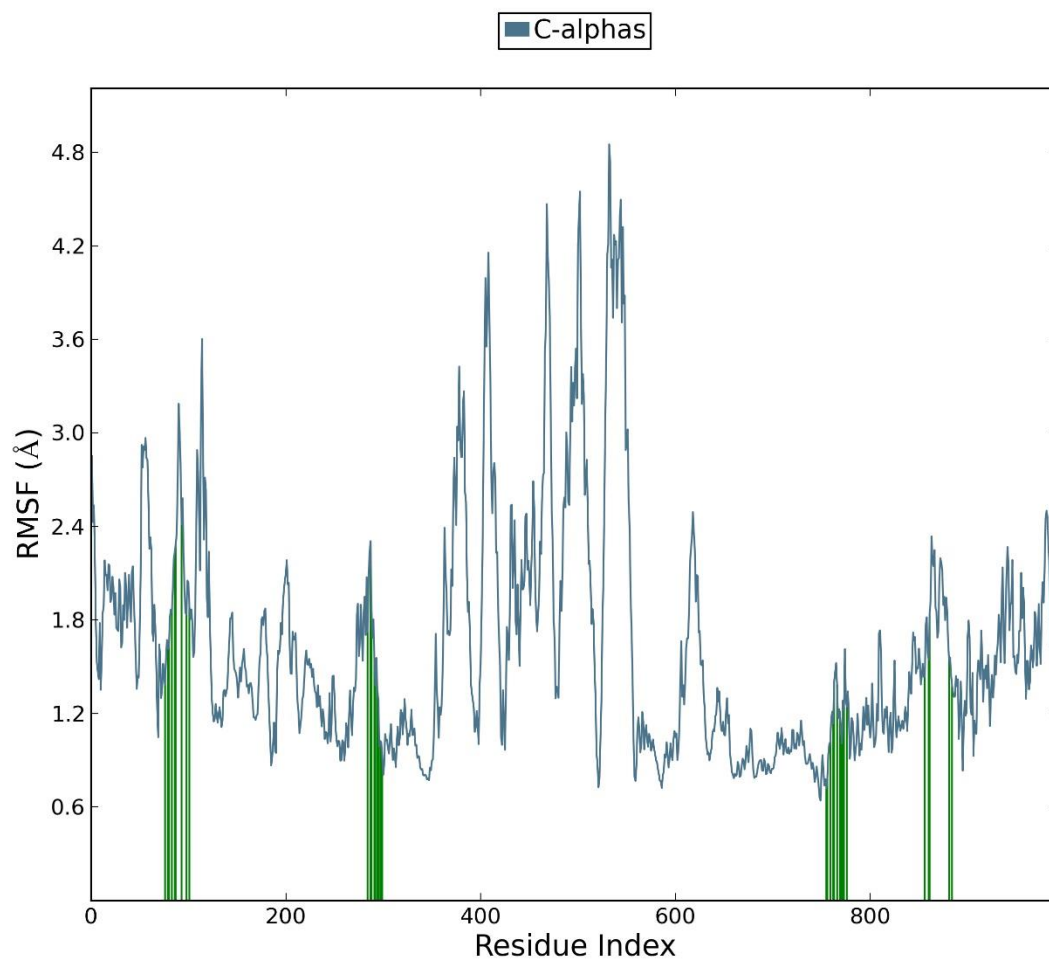

**Figure S11** Protein- ligand RMSF analysis with residue index and Time level:  $C\alpha$  (blue color), side chains (green color), heavy atoms (yellow color), ligand with protein (dark pink color), ligand with ligand (pink color); Structure of the 3A3Y with Ouabain - Residue Index against RMSF

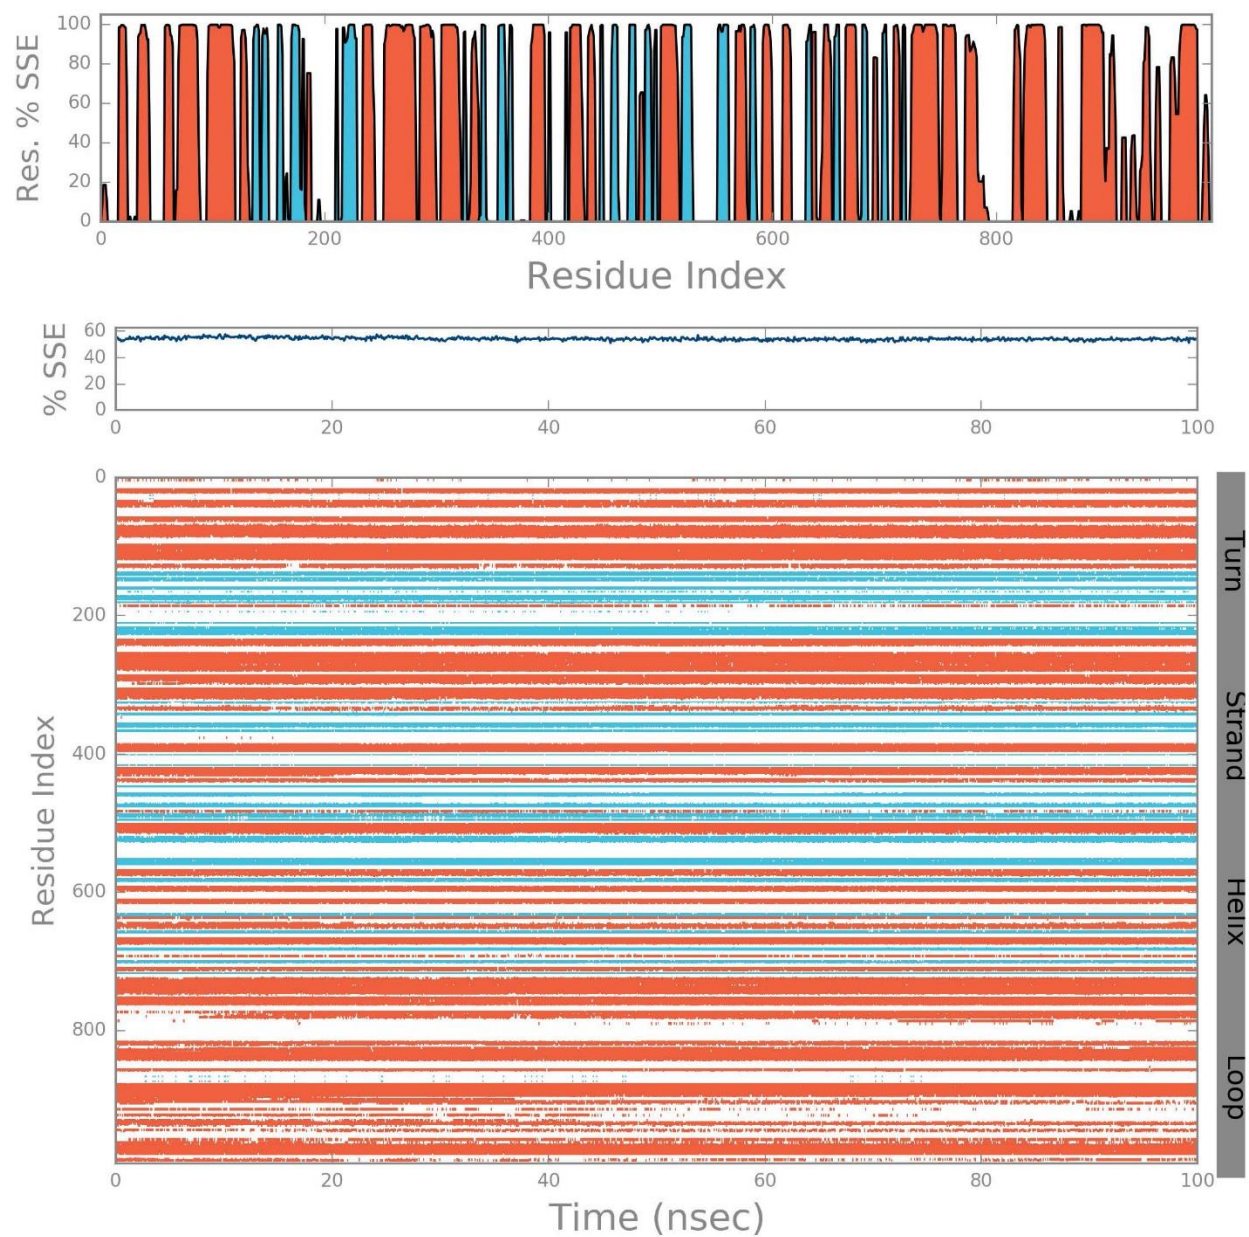

**Figure S12** Protein Secondary Structure elements evaluation by Time (ns) vs. residue index and % SSE vs. residue index

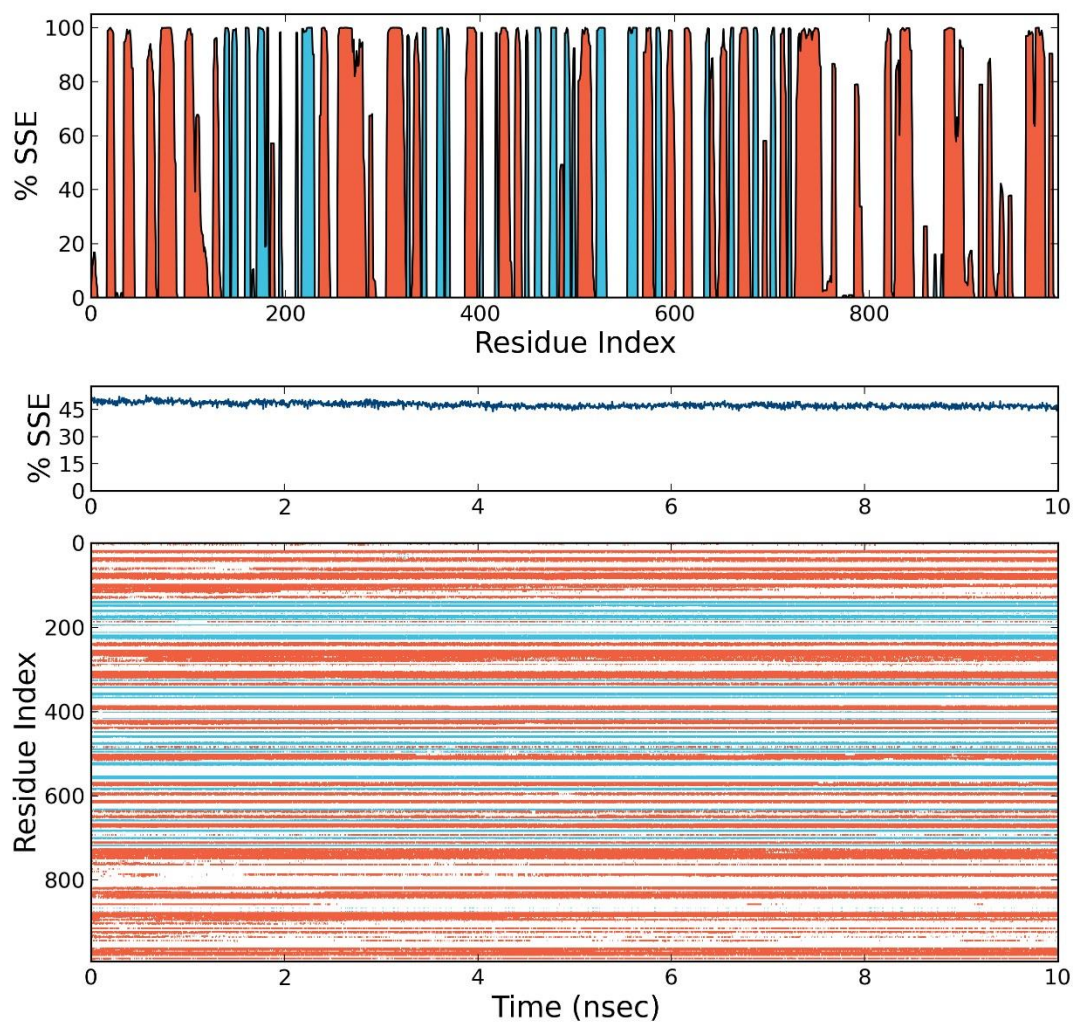

**Figure S13** Protein Secondary Structure elements evaluation by Time (ns) vs. residue index and % SSE vs. residue index



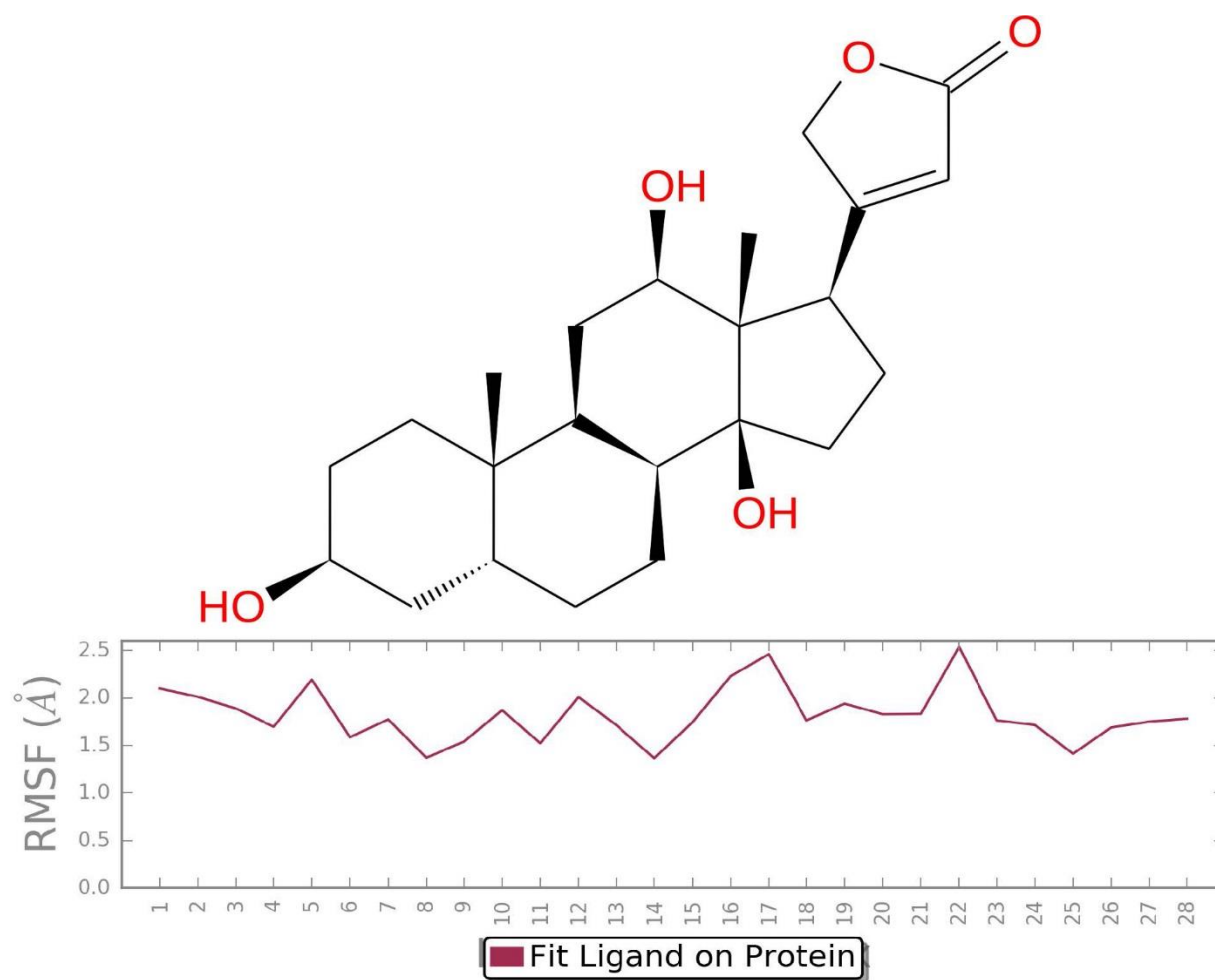

**Figure S14** Digoxigenin RMSF arrangement: Fit on protein (Dark pink), Fit on ligand (Light pink)

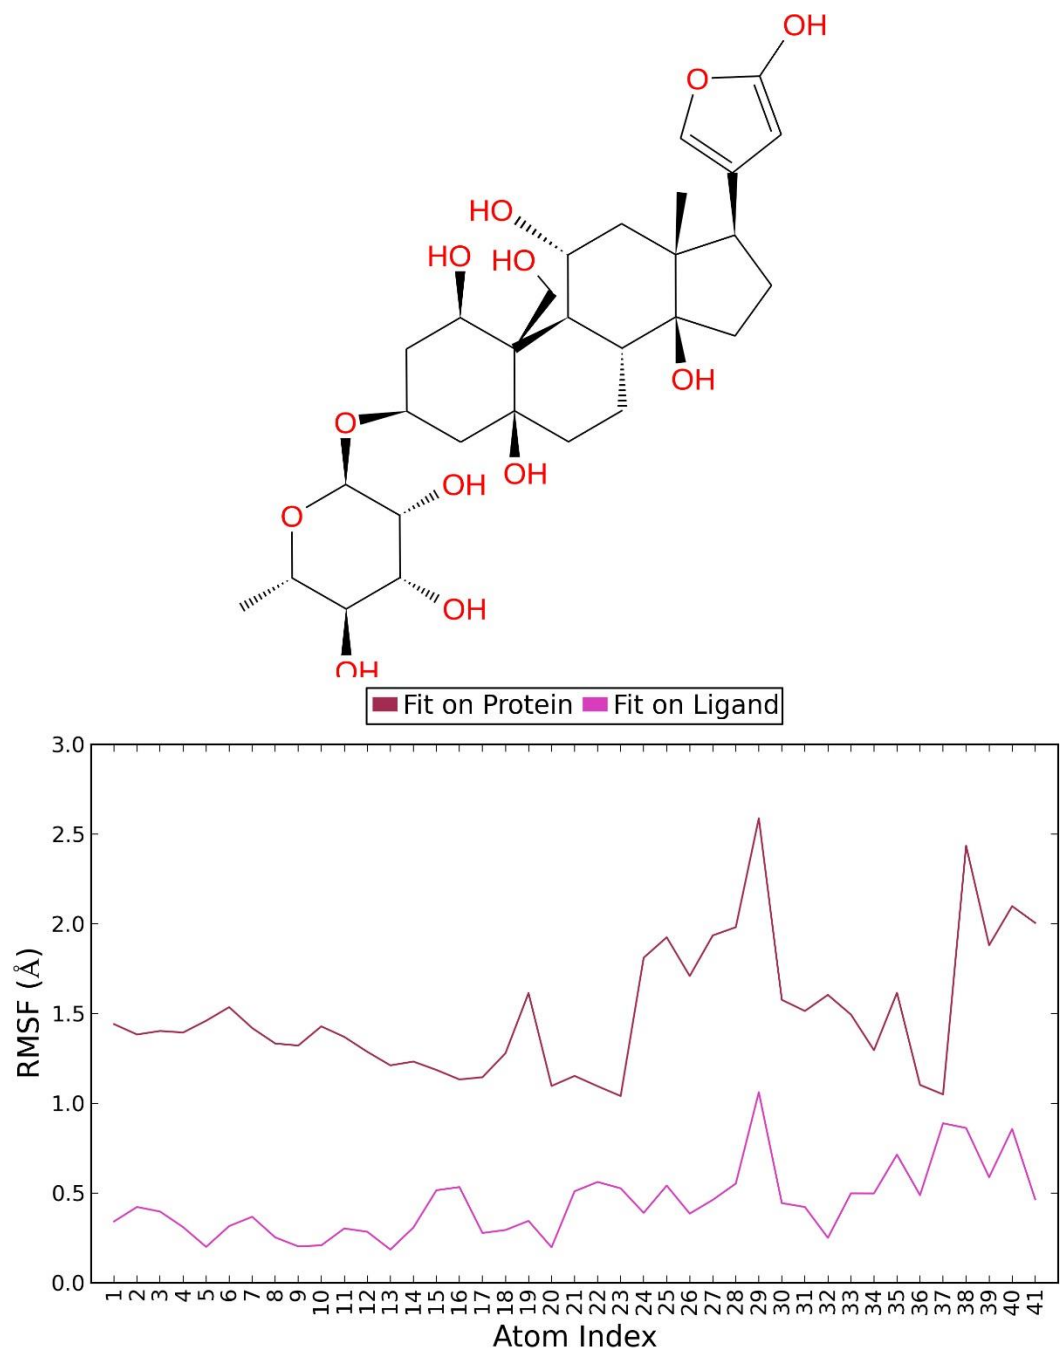

**Figure S15** Ouabain RMSF arrangement: Fit on protein (Dark pink), Fit on ligand (Light pink)

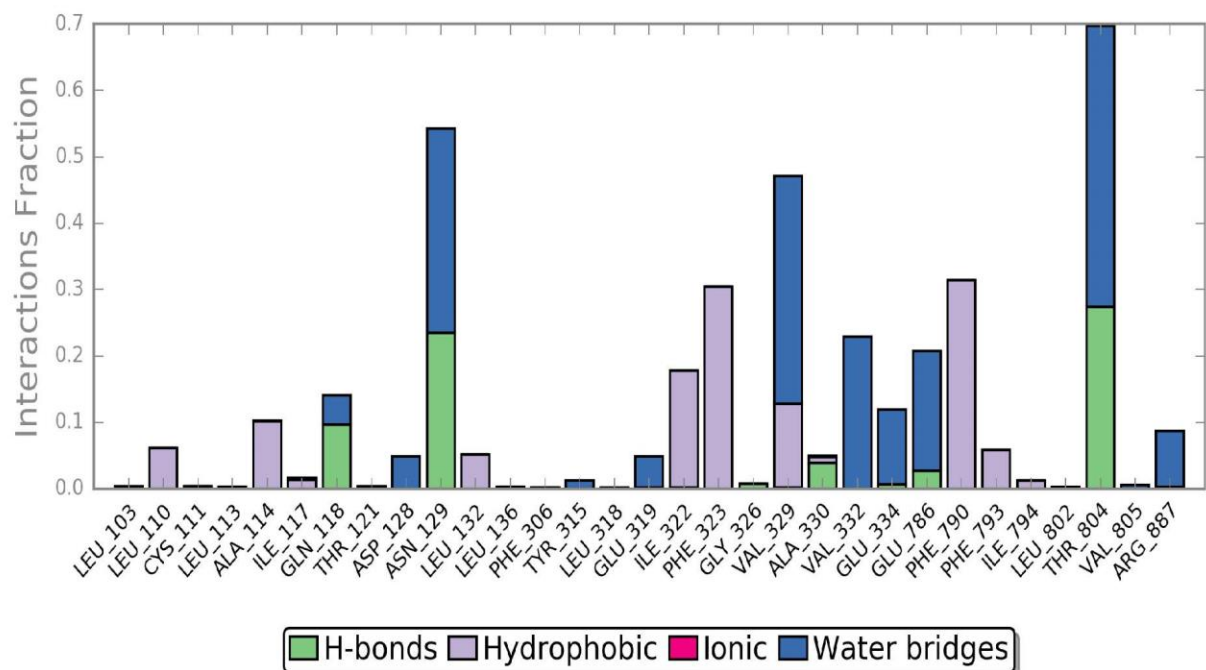

**Figure S16** Protein- Digoxigenin Contacts Interpretation

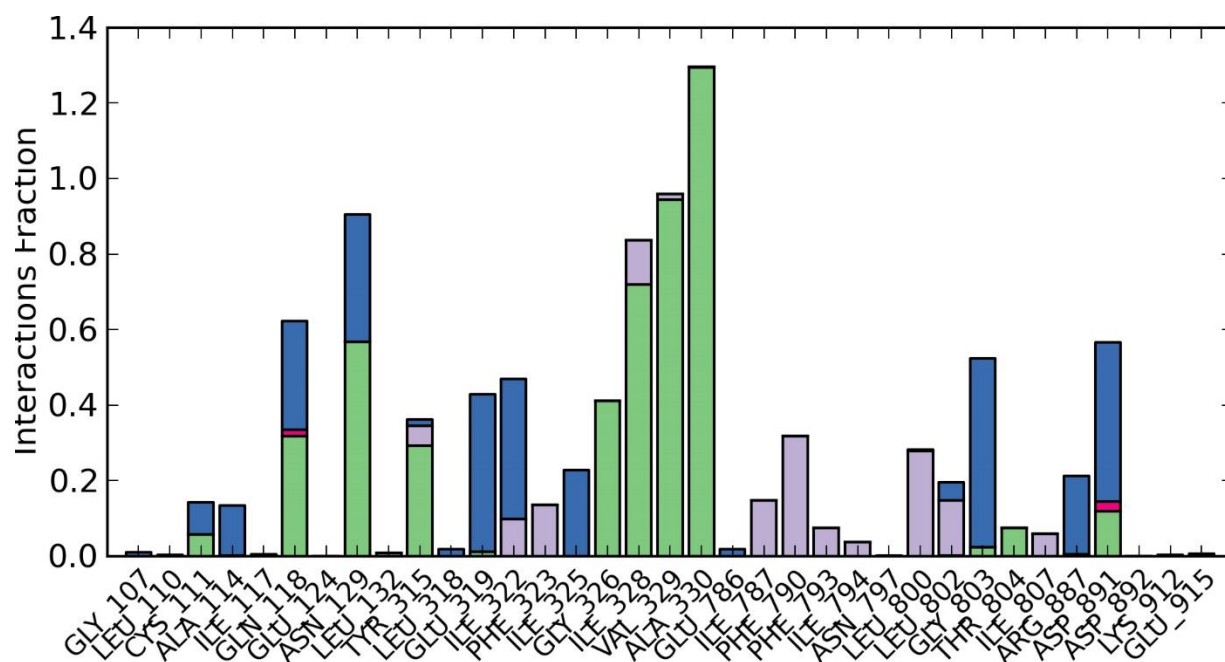

**Figure S17** Protein- Ouabain Contacts Interpretation

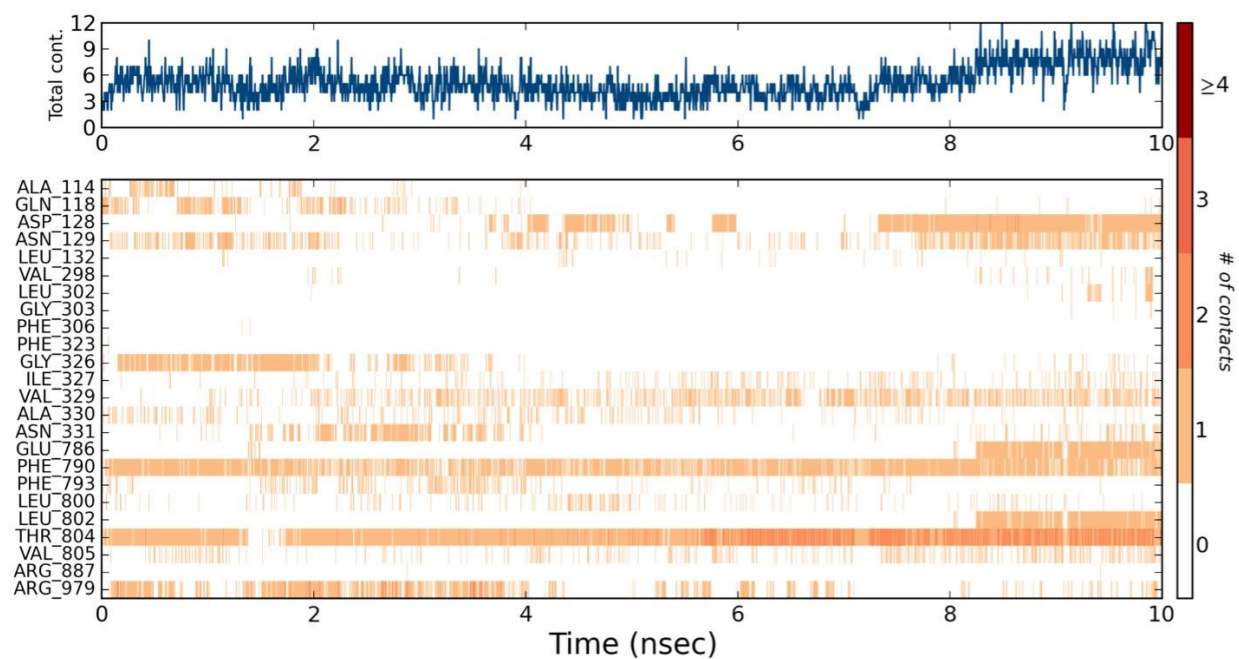

**Figure S18** Interpretation of Protein- Digoxigenin Contacts by heat map



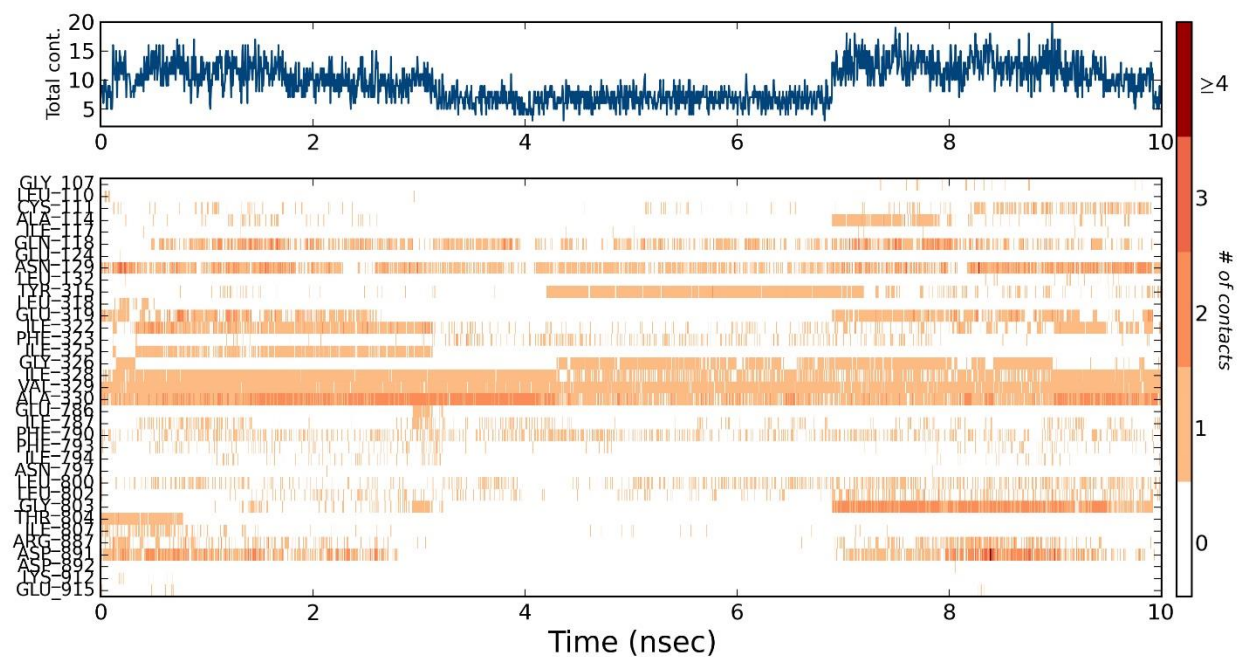

**Figure S19** Interpretation of Protein- Ouabain Contacts by heat map

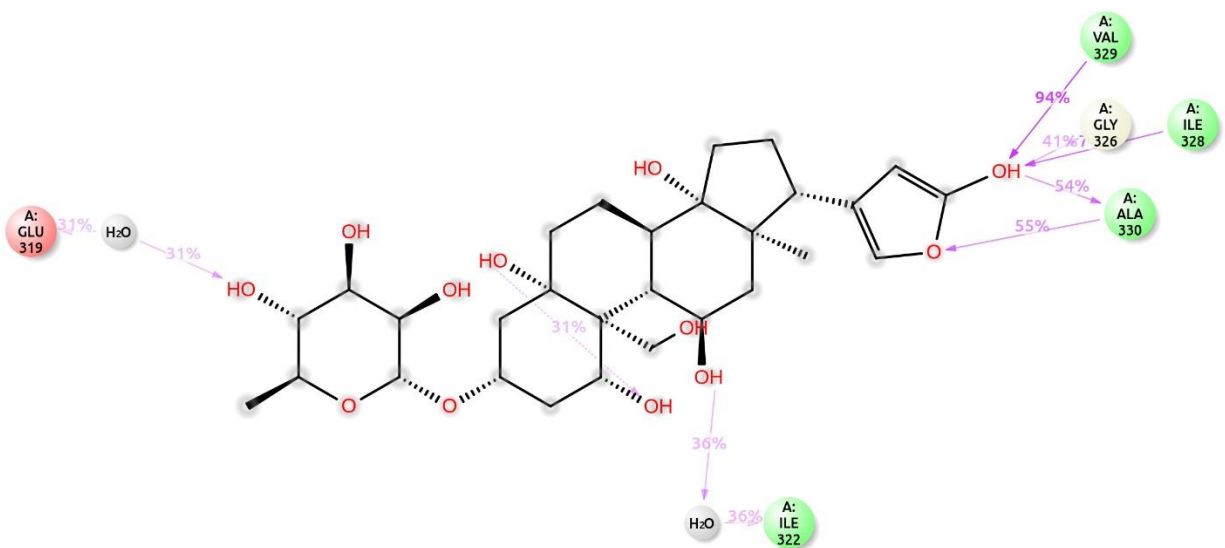

**Figure S20** Interpretation of Digoxigenin -Protein Conserved Contacts

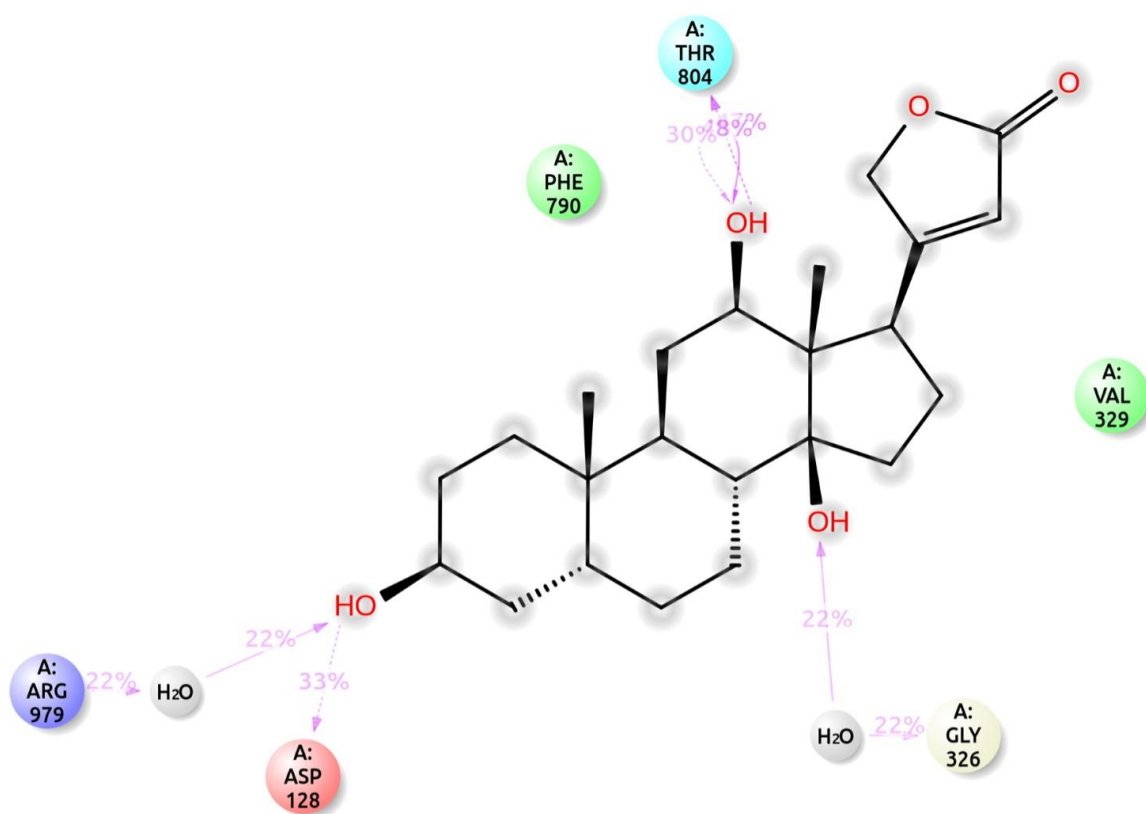

**Figure S21** Interpretation of Ouabain -Protein Conserved Contacts

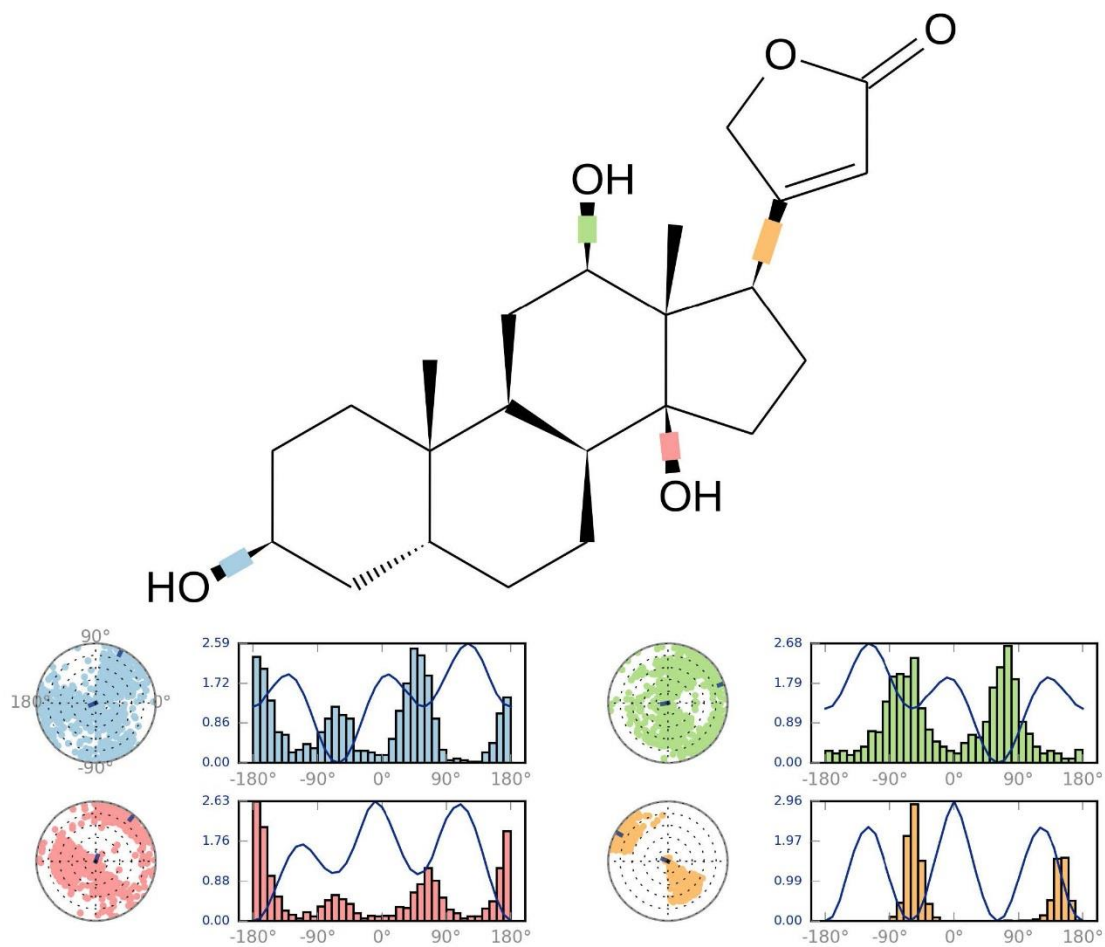

**Figure S22** Torsional profiles of Receptor-Digoxigenin complex

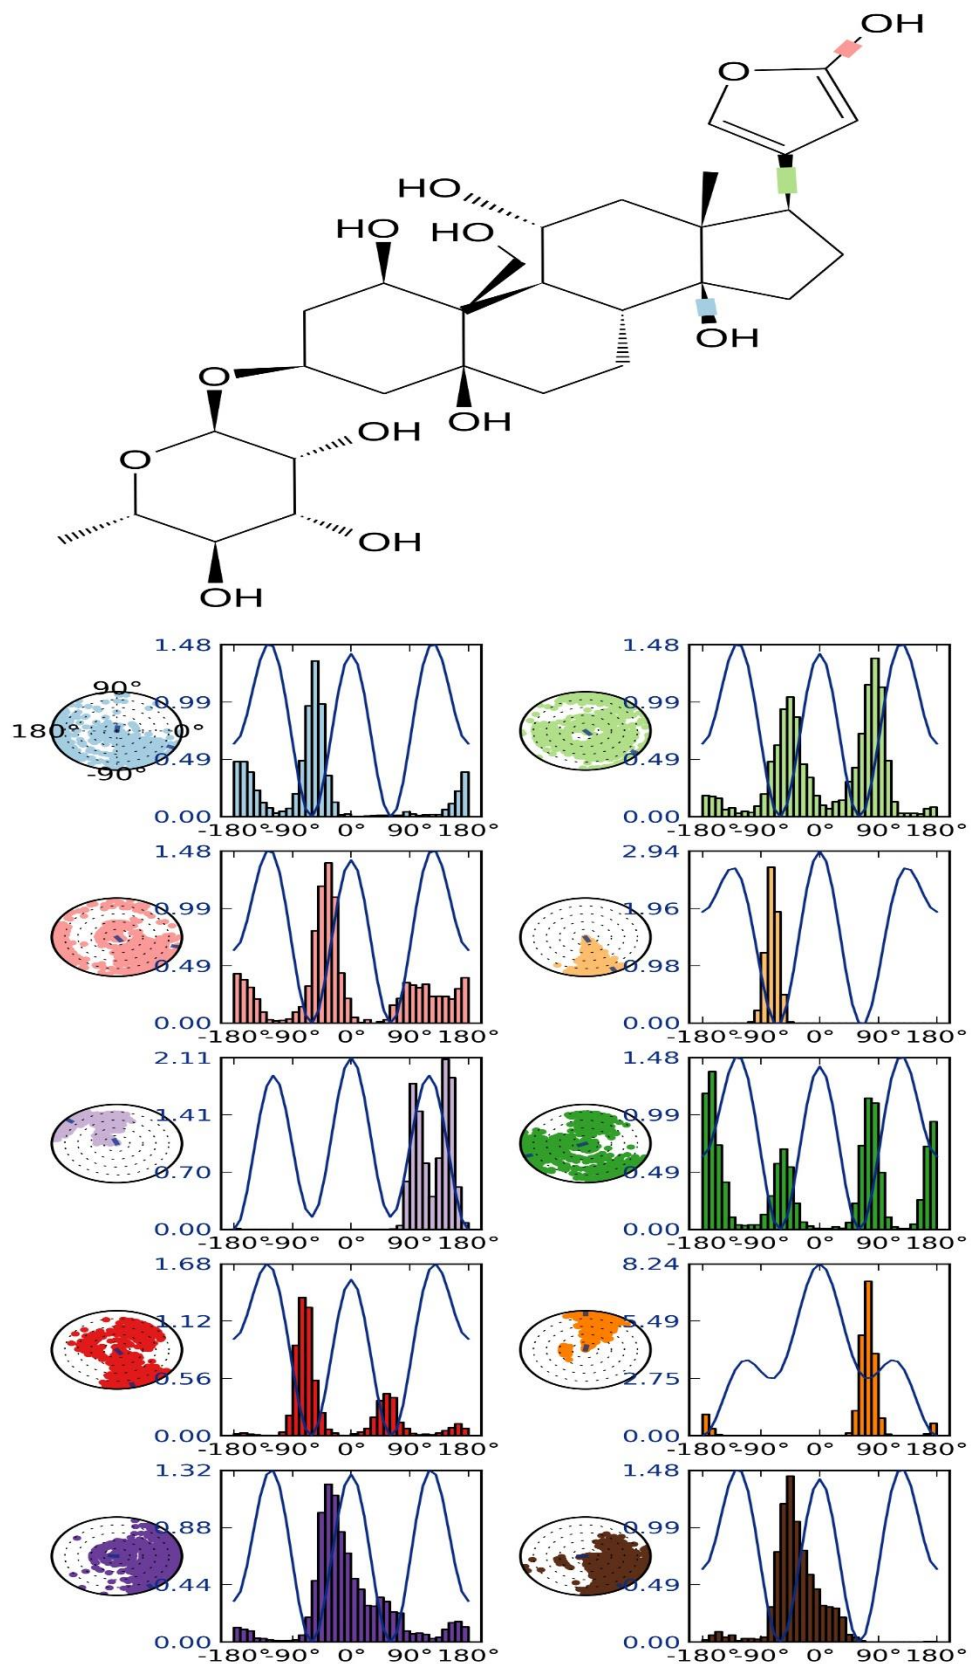

**Figure S23** Torsional profiles of Receptor- Ouabain complex
